# Supplementary material for: Identification of Three Type II Toxin-Antitoxin Systems in Model Bacterial Plant Pathogen Dickeya dadantii 3937
Source: MDPI journal article supplement (doi:10.3390/ijms22115932), 2021-05-31
Supplement: s1 [file s1]

# Identification of Three Type II Toxin-Antitoxin Systems in Model Bacterial Plant Pathogen *Dickeya dadantii* 3937

Lidia Boss <sup>1,\*</sup>, Marcin Górniak <sup>2</sup>, Alicja Lewańczyk <sup>1</sup>, Joanna Morcinek-Orłowska <sup>3</sup>, Sylwia Barańska <sup>1</sup> and Agnieszka Szalewska-Pałasz <sup>1</sup>

- <sup>1</sup> Department of Bacterial Molecular Genetics, University of Gdańsk, 80-309 Gdańsk, Poland; [a.lewanczyk.825@studms.ug.edu.pl](mailto:a.lewanczyk.825@studms.ug.edu.pl) (A.L.); [sylwia.baranska@ug.edu.pl](mailto:sylwia.baranska@ug.edu.pl) (S.B.); [agnieszka.szalewska-palasz@ug.edu.pl](mailto:agnieszka.szalewska-palasz@ug.edu.pl) (A.S.-P.)
- <sup>2</sup> Department of Molecular Evolution, University of Gdańsk, 80-309 Gdańsk, Poland; [marcin.gorniak@ug.edu.pl](mailto:marcin.gorniak@ug.edu.pl)
- <sup>3</sup> Department of Molecular Biology, University of Gdańsk, 80-309 Gdańsk, Poland; [joanna.morcinek-orlowska@phdstud.ug.edu.pl](mailto:joanna.morcinek-orlowska@phdstud.ug.edu.pl) (J. M.-O.)
- \* Correspondence: [lidia.boss@ug.edu.pl](mailto:lidia.boss@ug.edu.pl)

## Supplementary Data

**Table S1.** Generation time (min) of the *D. dadantii* 3937 overexpressing the putative toxins or toxin-antitoxin complexes.

|                                | pBAD-toxin   | pBAD-antitoxin-toxin |
|--------------------------------|--------------|----------------------|
| <i>ccdAB</i> <sub>2Dda</sub>   | 63.5 +/- 2.4 | 62.4 +/- 7.9         |
| <i>phd-doc</i> <sub>2Dda</sub> | 83.2 +/- 3.9 | 56.5 +/- 2.8         |
| <i>dhiTA</i>                   | 78.9 +/- 2.9 | 65.9 +/- 1.5         |

**Table S2.** Bacterial strains and plasmids used in this study.

| Strain or plasmid                     | Relevant characteristics                                                                                                               | Source or reference                                             |
|---------------------------------------|----------------------------------------------------------------------------------------------------------------------------------------|-----------------------------------------------------------------|
| <b>Strains</b>                        |                                                                                                                                        |                                                                 |
| <i>Dickeya dadantii</i> 3937          | Genomic DNA and total RNA source, host for in vivo experiments with selective expression vectors                                       | Wild-type strain isolated from <i>Saintpaulia ionantha</i> [63] |
| <i>Escherichia coli</i>               |                                                                                                                                        |                                                                 |
| DH5α                                  | Cloning host for recombinant vectors                                                                                                   | [64]                                                            |
| MG1655                                | Host for promoter activity assays and for in vivo experiments with selective expression vectors                                        | [65]                                                            |
| MG1655Δ <i>lacZ</i>                   | Host for plasmid stabilization assay                                                                                                   | Lab stock                                                       |
| <b>Plasmids</b>                       |                                                                                                                                        |                                                                 |
| pBAD24                                | Selective expression vector; amp <sup>R</sup>                                                                                          | [66]                                                            |
| pBAD24- <i>ccdAB</i> <sub>2Dda</sub>  | pBAD24 derivative containing <i>ccdAB</i> <sub>2Dda</sub> genes under control of arabinose-inducible <i>P</i> <sub>BAD</sub> promoter  | This study                                                      |
| pBAD24- <i>ccdA</i> <sub>2Dda</sub>   | pBAD24 derivative containing <i>ccdA</i> <sub>2Dda</sub> gene under control of arabinose-inducible <i>P</i> <sub>BAD</sub> promoter    | This study                                                      |
| pBAD24- <i>ccdB</i> <sub>2Dda</sub>   | pBAD24 derivative containing <i>ccdB</i> <sub>2Dda</sub> gene under control of arabinose-inducible <i>P</i> <sub>BAD</sub> promoter    | This study                                                      |
| pBAD24- <i>phd-doc</i> <sub>Dda</sub> | pBAD24 derivative containing <i>phd-doc</i> <sub>Dda</sub> genes under control of arabinose-inducible <i>P</i> <sub>BAD</sub> promoter | This study                                                      |
| pBAD24- <i>phd</i> <sub>Dda</sub>     | pBAD24 derivative containing <i>phd</i> <sub>Dda</sub> gene under control of arabinose-inducible <i>P</i> <sub>BAD</sub> promoter      | This study                                                      |

| Strain or plasmid            | Relevant characteristics                                                                                                                        | Source or reference |
|------------------------------|-------------------------------------------------------------------------------------------------------------------------------------------------|---------------------|
| pBAD24-docDda                | pBAD24 derivative containing <i>docDda</i> gene under control of arabinose-inducible <i>P<sub>BAD</sub></i> promoter                            | This study          |
| p24dhiTA                     | pBAD24 derivative containing <i>dhiTA</i> genes under control of arabinose-inducible <i>P<sub>BAD</sub></i> promoter                            | This study          |
| p24dhiA                      | pBAD24 derivative containing <i>dhiA</i> gene under control of arabinose-inducible <i>P<sub>BAD</sub></i> promoter                              | This study          |
| p24dhiT                      | pBAD24 derivative containing <i>dhiT</i> gene under control of arabinose-inducible <i>P<sub>BAD</sub></i> promoter                              | This study          |
| pBBRlux                      | Vector for generating transcriptional fusion to <i>lux</i> , Cm <sup>r</sup>                                                                    | [55]                |
| pLuxccdAB <sub>2Dda</sub>    | pBBRlux derivative containing the 100bp fragment upstream <i>ccdA<sub>2Dda</sub></i> gene, cloned upstream promoter-less <i>luxCDABE operon</i> | This study          |
| pLuxphd-doc <sub>2Dda</sub>  | pBBRlux derivative containing the 100bp fragment upstream <i>phd<sub>Dda</sub></i> gene, cloned upstream promoter-less <i>luxCDABE operon</i>   | This study          |
| pLuxdhiTA                    | pBBRlux derivative containing the 100bp fragment upstream <i>dhiT</i> gene, cloned upstream promoter-less <i>luxCDABE operon</i>                | This study          |
| pRC7                         | Unstable, low-copy-number, mini-F derivative of pFZY1, used for plasmid stabilization assays                                                    | [35]                |
| pRC7-ccdAB <sub>2Dda</sub>   | pRC7 derivative containing <i>ccdAB<sub>2Dda</sub></i> toxin-antitoxin operon including promoter region, cloned within ApaI site                | This study          |
| pRC7-phd-doc <sub>2Dda</sub> | pRC7 derivative containing <i>phd-doc<sub>2Dda</sub></i> toxin-antitoxin operon including promoter region, cloned within ApaI site              | This study          |
| pRC7-dhiTA                   | pRC7 derivative containing <i>dhiTA</i> toxin-antitoxin operon including promoter region, cloned within ApaI site                               | This study          |

**Table S3.** Primers used in this study.

| Primer | Sequence (5'-3')                                | Relevant characteristics                                                                                                            |
|--------|-------------------------------------------------|-------------------------------------------------------------------------------------------------------------------------------------|
| 1      | GCTAGCAGGAGGAATTCACCATGCCGACTACAAAAGCATA<br>CGA | Primer (forward) for <i>ccdA(B)<sub>2Dda</sub></i> amplification with primer 2 or 4, fragment cloned into pBAD24 digested with SmaI |
| 2      | GTCGACTCTAGAGGATCCCCTTAAAACGTCCTGAATCAT         | Primer (reverse) for <i>ccdA<sub>2Dda</sub></i> amplification with primer 1, fragment cloned into pBAD24 digested with SmaI         |
| 3      | GCTAGCAGGAGGAATTCACCATGCAGTACATGGTGTACG         | Primer (forward) for <i>ccdB<sub>2Dda</sub></i> amplification with primer 4, fragment cloned into pBAD24 digested with SmaI         |
| 4      | GTCGACTCTAGAGGATCCCCGGGTCAAACCCGTCTAGCA<br>AAA  | Primer (reverse) for <i>ccdA(B)<sub>2Dda</sub></i> amplification with primer 1 or 3, fragment cloned into pBAD24 digested with SmaI |
| 5      | GCTAGCAGGAGGAATTCACCATGAAGACTTATACC             | Primer (forward) for <i>phd(doc)<sub>Dda</sub></i> amplification with primer 6 or 8, fragment cloned into pBAD24 digested with SmaI |
| 6      | GTCGACTCTAGAGATCCCCTCATCTGTGCGGCGAG             | Primer (reverse) for <i>phd<sub>Dda</sub></i> amplification with primer 5, fragment cloned into pBAD24 digested with SmaI           |
| 7      | GCTAGCAGGAGGAATTCACCATGAAATGGGTGAGTGCGC         | Primer (forward) for <i>docDda</i> amplification with primer 8, fragment cloned into pBAD24 digested with SmaI                      |

| Primer | Sequence (5'-3')                                  | Relevant characteristics                                                                                                                                               |
|--------|---------------------------------------------------|------------------------------------------------------------------------------------------------------------------------------------------------------------------------|
| 8      | GTCGACTCTAGAGGATCCCCTTATTTTCCACCCGTG              | Primer (reverse) for <i>phd(doc)<sub>Dda</sub></i> amplification with primer 5 or 7, fragment cloned into pBAD24 digested with SmaI                                    |
| 9      | GCTAGCAGGAGGAATTCACCATGCCTGAAATTGAC               | Primer (forward) for <i>dhiT(A)</i> amplification with primer 10 or 12, fragment cloned into pBAD24 digested with SmaI                                                 |
| 10     | GTCGACTCTAGAGGATCCCCTCACAATTTTCCCGGATG            | Primer (reverse) for <i>dhiT</i> amplification with primer 10, fragment cloned into pBAD24 digested with SmaI                                                          |
| 11     | GCTAGCAGGAGGAATTCACCATGCATAAAATCATC               | Primer (forward) for <i>dhiA</i> amplification with primer 12, fragment cloned into pBAD24 digested with SmaI                                                          |
| 12     | GTCGACTCTAGAGGATCCCCCTACTTCTCTTCCAG               | Primer (reverse) for <i>dhiT(A)</i> amplification with primer 10 or 11, fragment cloned into pBAD24 digested with SmaI                                                 |
| 13     | GGTGGCGGCCGCTCTAGAACTAGTGCCTGAGCGGGTATCG<br>CGGCG | Primer (forward) for putative promoter region of <i>ccdAB<sub>2Dda</sub></i> amplification with primer 14, fragment cloned into pBBRlux digested with BamHI            |
| 14     | ATCCATTTTGCGGCCGCAACTAGAGGTTGCCCTCCATTTAC<br>ACGT | Primer (reverse) for putative promoter region of <i>ccdAB<sub>2Dda</sub></i> amplification with primer 13, fragment cloned into pBBRlux digested with BamHI            |
| 15     | GGTGGCGGCCGCTCTAGAACTAGTGGGTTGGGGGCTTTTTT<br>TATA | Primer (forward) for putative promoter region of <i>phd-doc<sub>Dda</sub></i> amplification with primer 16, fragment cloned into pBBRlux digested with BamHI           |
| 16     | ATCCATTTTGCGGCCGCAACTAGAGGGCTCCCCCTTGAAAT<br>GTAC | Primer (reverse) for putative promoter region of <i>phd-doc<sub>Dda</sub></i> amplification with primer 15, fragment cloned into pBBRlux digested with BamHI           |
| 17     | GGTGGCGGCCGCTCTAGAACTAGTGGTGGAATCAACATGA<br>AACCT | Primer (forward) for putative promoter region of <i>dhiTA</i> amplification with primer 18, fragment cloned into pBBRlux digested with BamHI                           |
| 18     | ATCCATTTTGCGGCCGCAACTAGAGTGGCACTCCTTGTCAA<br>TGAG | Primer (reverse) for putative promoter region of <i>dhiTA</i> amplification with primer 17, fragment cloned into pBBRlux digested with BamHI                           |
| 19     | TCACCAGCAAATCGCGCTGTTAGCGTGAGCGGGTATCGCG<br>GCGTA | Primer (reverse) for <i>ccdAB<sub>2Dda</sub></i> amplification, including putative promoter region, used with primer 20, fragment cloned into pRC7 digested with ApaI  |
| 20     | AGACGCGCCGAGACAGAACTTAATGTCAAAACCCGTCTAG<br>CAAAA | Primer (forward) for <i>ccdAB<sub>2Dda</sub></i> amplification, including putative promoter region, used with primer 19, fragment cloned into pRC7 digested with ApaI  |
| 21     | TCACCAGCAAATCGCGCTGTTAGCGTTGGGGGCTTTTTTTAT<br>AAC | Primer (reverse) for <i>phd-doc<sub>Dda</sub></i> amplification, including putative promoter region, used with primer 22, fragment cloned into pRC7 digested with ApaI |

| Primer | Sequence (5'-3')                                  | Relevant characteristics                                                                                                                                           |
|--------|---------------------------------------------------|--------------------------------------------------------------------------------------------------------------------------------------------------------------------|
| 22     | AGACGCGCCGAGACAGAACTTAATGTTATTTTCCACCCGT<br>TGTC  | Primer (forward) for <i>phd-docDda</i> amplification, including putative promoter region, used with primer 21, fragment cloned into pRC7 digested with <i>Apal</i> |
| 23     | TCACCAGCAAATCGCGCTGTTAGCGTGGAATCAACATGAA<br>ACCTT | Primer (forward) for <i>dhiTA</i> amplification, including putative promoter region, used with primer 24, fragment cloned into pRC7 digested with <i>Apal</i>      |
| 24     | AGACGCGCCGAGACAGAACTTAATGCTACTTCTCTTCCAGT<br>TGTA | Primer (reverse) for <i>dhiTA</i> amplification, including putative promoter region, used with primer 23, fragment cloned into pRC7 digested with <i>Apal</i>      |
| 25     | ACTACAAGCATACGACAC                                | Primer (forward) for RT-PCR analysis of <i>ccdAB<sub>2Dda</sub></i> module transcript                                                                              |
| 26     | TCATCACCAGATAATCAC                                | Primer (reverse) for RT-PCR analysis of <i>ccdAB<sub>2Dda</sub></i> module transcript                                                                              |
| 27     | TATACCATTACTGAAGCC                                | Primer (forward) for RT-PCR analysis of <i>phd-docDda</i> module transcript                                                                                        |
| 28     | CTTAATGGTGAGTTCTTC                                | Primer (reverse) for RT-PCR analysis of <i>phd-docDda</i> module transcript                                                                                        |
| 29     | GATGATGAGTTGATCATC                                | Primer (forward) for RT-PCR analysis of <i>dhiTA</i> module transcript                                                                                             |
| 30     | CTCTTCCAGTTGTAACAC                                | Primer (reverse) for RT-PCR analysis of <i>dhiTA</i> module transcript                                                                                             |

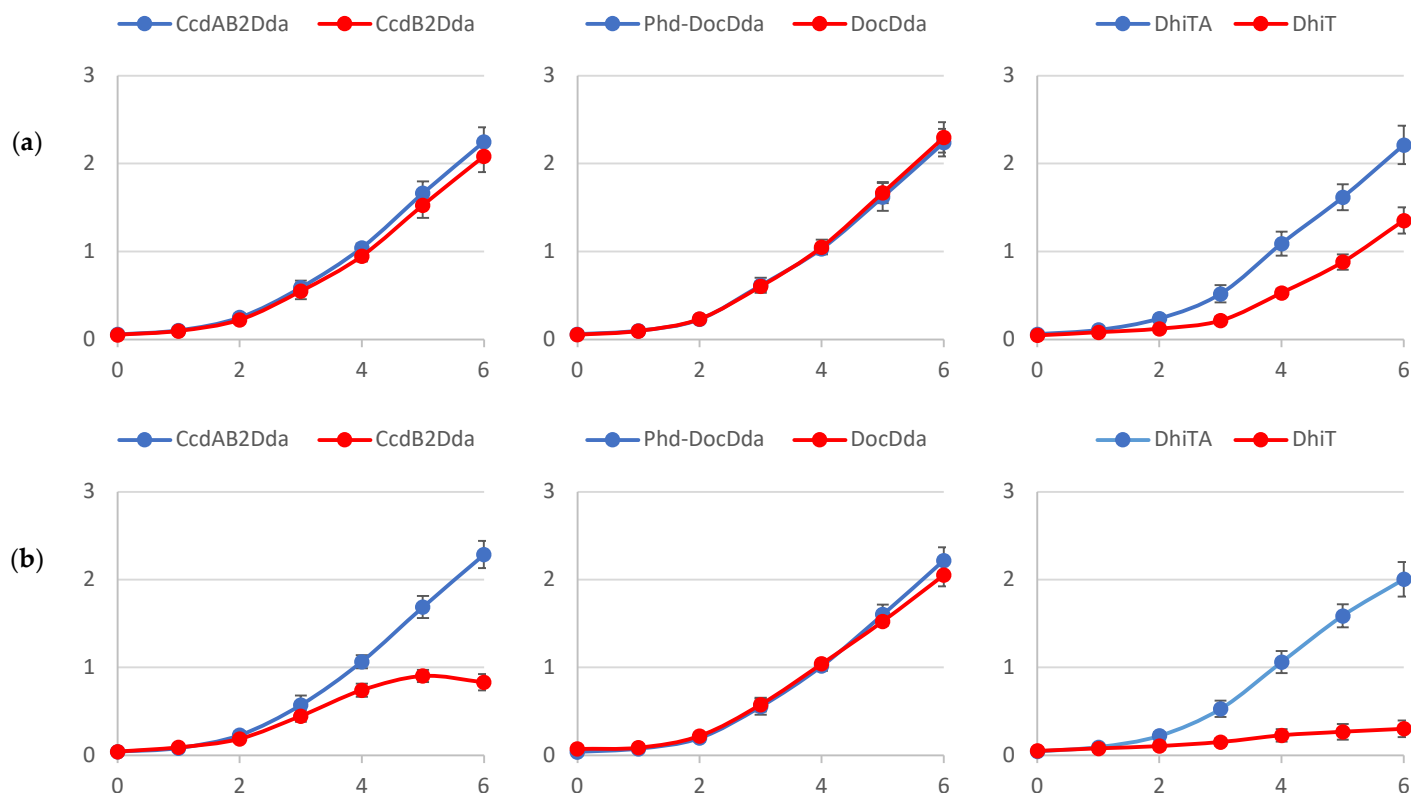

**Figure S1.** Effect of induction of expression of the putative toxins on growth of the *E. coli* K-12 MG1655. *E. coli* cells, harbouring plasmids encoding the toxin (red ♦) or antitoxin-toxin (blue ●) genes under control of the  $P_{BAD}$  promoter, were grown to OD<sub>600</sub> of 0.05–0.08. Each culture was then supplemented with either 0.2 % D-glucose (a) or 0.2 % L-arabinose (b). Culture growth was monitored by measuring OD<sub>600</sub> every hour. The results are an averages of at least 3 independent experiments with SD indicated.

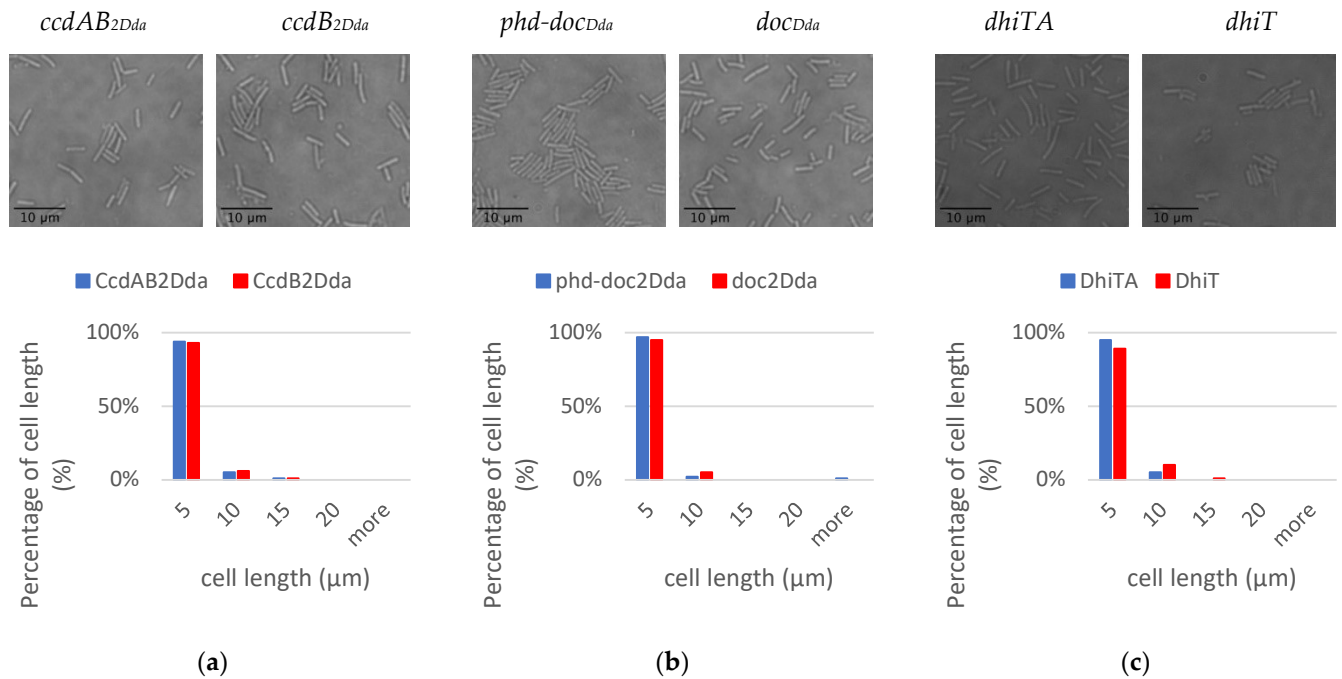

**Figure S2.** The effect of overexpression of the toxins on the *D. dadantii* 3937 cell morphology. pBAD24 derivatives harbouring genes encoding (a) CcdAB<sub>2Dda</sub> system or toxin CcdB<sub>2Dda</sub>, (b) Phd-Doc<sub>2Dda</sub> system or Doc<sub>2Dda</sub>, toxin (c) DhiTA system or DhiT toxin were introduced into *D. dadantii* 3937 cells and were induced with 0.2 % arabinose. *D. dadantii* 3937 cells cultured in the same conditions were used as a cell length control. Light microscope morphology of *D. dadantii* 3937 cells (×100), cell length was measured for 100 bacteria for each strain. Examples of relevant microphotographs are above the graphs.

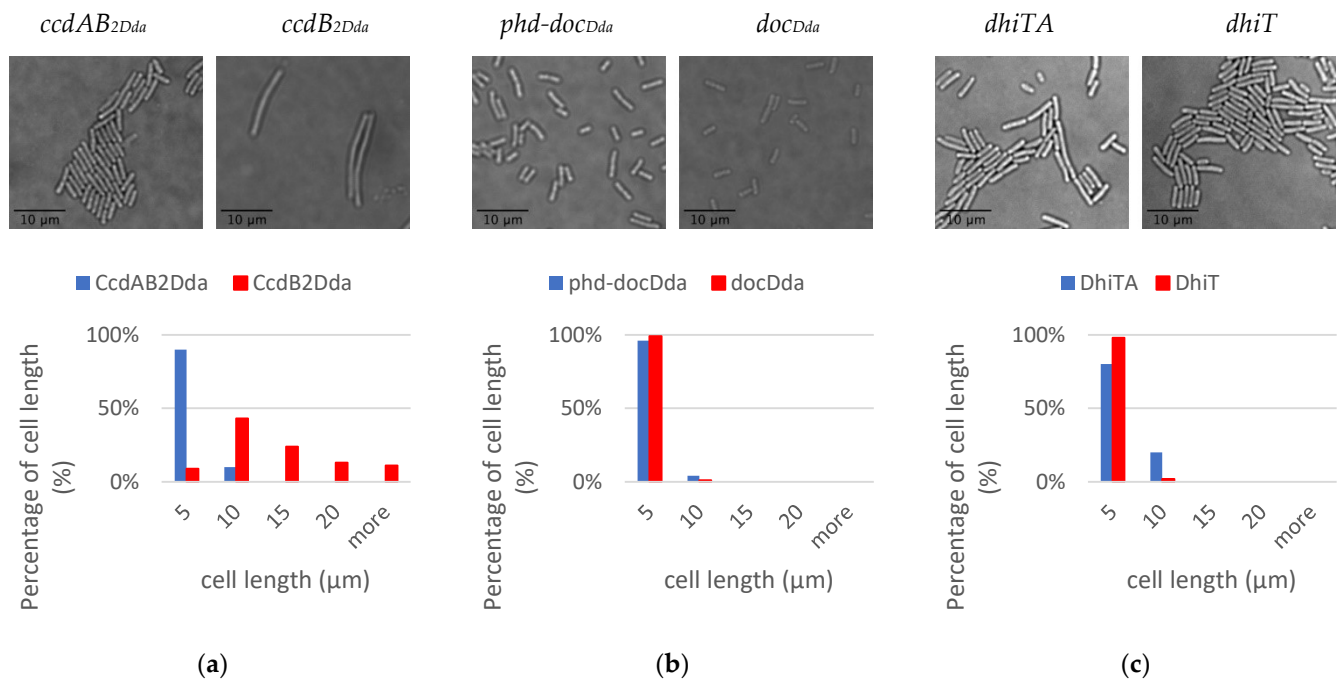

**Figure S3.** The effect of overexpression of the *D. dadantii* 3937 toxins on the *E. coli* cell morphology. pBAD24 derivatives harbouring genes encoding (a) CcdAB<sub>2Dda</sub> system or toxin CcdB<sub>2Dda</sub>, (b) Phd-Doc<sub>Dda</sub> system or Doc<sub>Dda</sub> toxin (c) DhiTA system or DhiT toxin were introduced into *E. coli* cells and were induced with 0.2 % arabinose. *E. coli* cells cultured in the same conditions were used as a cell length control. Light microscope morphology of *E. coli* cells (×100), cell length was measured for 100 bacteria for each strain. Examples of relevant microphotographs are above the graphs.
